# Supplementary material for: A luminescent europium complex for wide-range pH sensors and sensor microtiterplates
Source: Royal Society of Chemistry journal article supplement (doi:10.1039/c8an00775f), 2018-01-01
Supplement: c8an00775f1.pdf [file c8an00775f1.pdf]

## Supplementary Information

### **Luminescent europium complex for wide-range pH sensor and sensor microtiterplate**

Wafaa Waleed Al-Qaysi, Axel Dürkop\*

Institute of Analytical Chemistry, Chemo and Biosensors, University of Regensburg, 93040  
Regensburg, Germany

---

<sup>a</sup> Institute of Analytical Chemistry, Chemo and Biosensors, University of Regensburg, 93040 Regensburg, Germany; E-mail: axel.duerkop@ur.de; wafaa.al-qaysi@chemie.uni-regensburg.de; Tel.: (+49) 941-943-4063

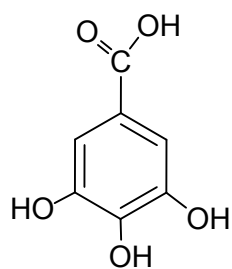

Gallic acid

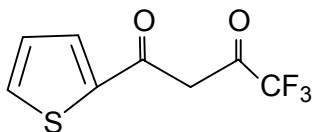

TTA

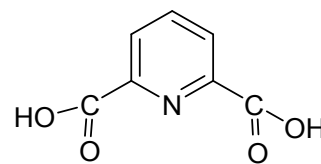

PDA

Scheme 1 Chemical structures of Gall, TTA and PDA

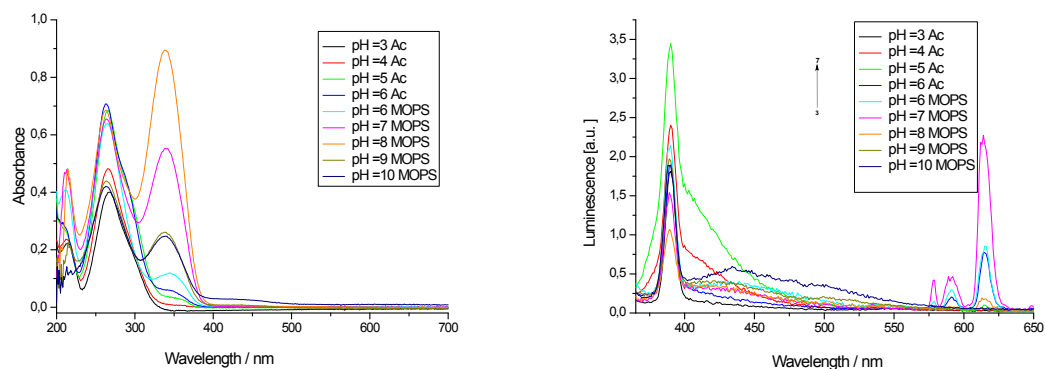

Figure S1 Absorption and emission spectra of Eu-TTA-Gall in 1:3:1 molar ratio ( $c = 10 \mu\text{mol/L}$  related to  $c(\text{Eu}^{3+})$ , Ac or MOPS buffer 10 mmol/L).

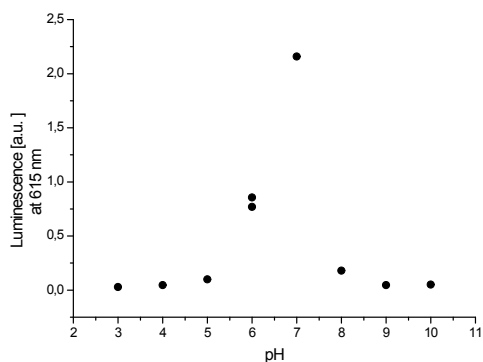

Figure S2 Titration plot derived from the emission spectra of Eu-TTA-Gall in 1:3:1 molar ratio at 615 nm.

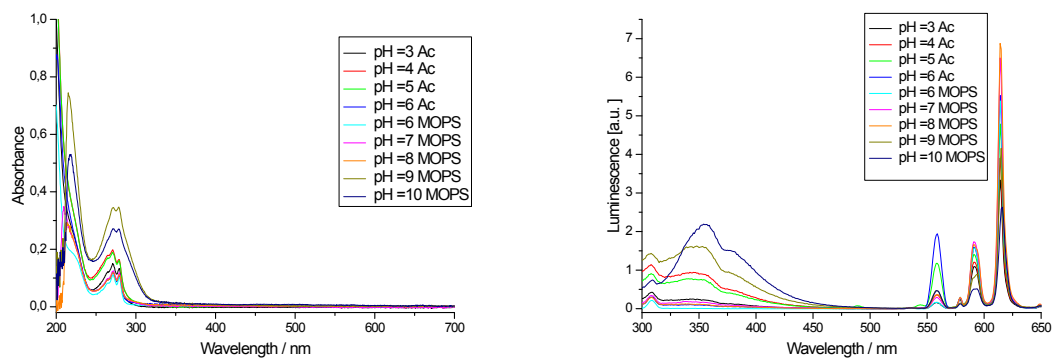

Figure S3 Absorption and emission spectra of Eu-PDA in 1:1 molar ratio ( $c = 10 \mu\text{mol/L}$  related to  $c(\text{Eu}^{3+})$ , Ac or MOPS buffer 10 mmol/L).

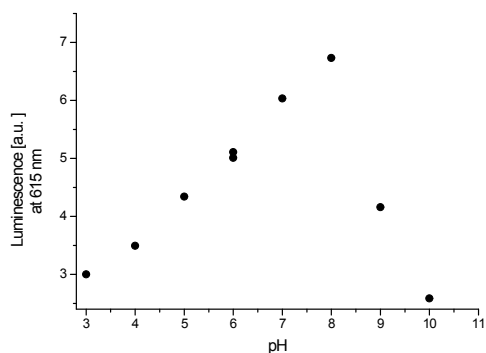

Figure S4 Titration plot derived from the emission intensity of Eu-PDA in 1:1 molar ratio at 615 nm.

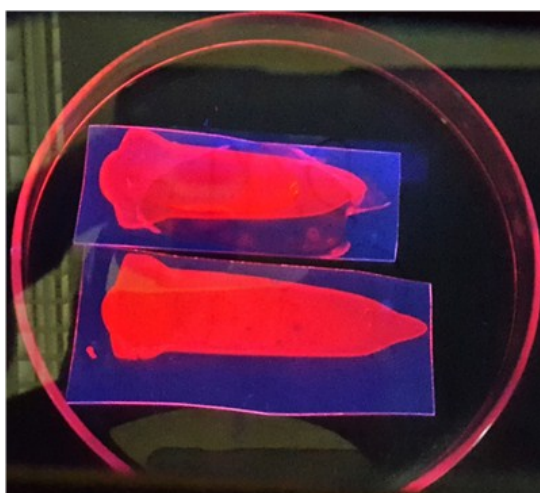

Figure S5 pH sensor foil containing  $\text{Eu}^{3+}$ -TTA- PDA-Gall (1:3:1:1) upon illumination with a UV lamp (366 nm).

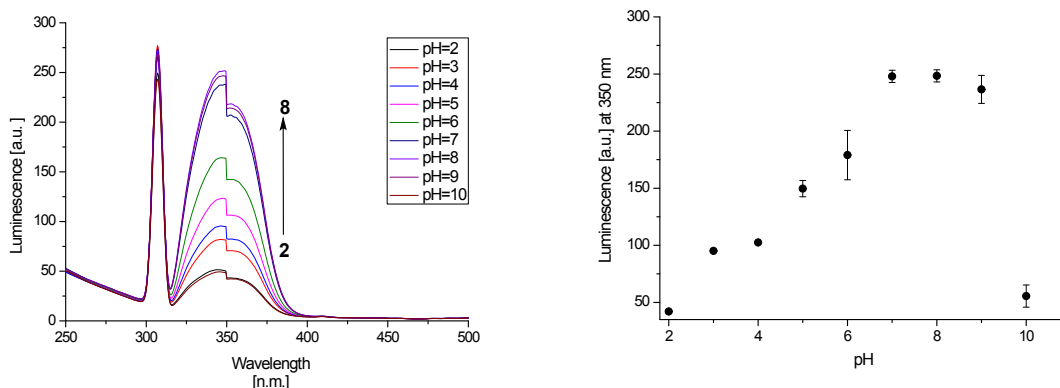

Figure S6 Excitation spectra of sensor membrane containing  $\text{Eu}^{3+}$ -TTA-PDA-Gall in molar ratio 1:3:1:1 ( $c=10$  mmol/L related to  $\text{Eu}^{3+}$ , Ac-MOPS-CAPS buffer (10 mmol/L),  $\lambda_{\text{em}}=615$  nm,  $n=4$ ). The sudden drops of the emission at 352 nm in the spectra are an instrumental artifact.

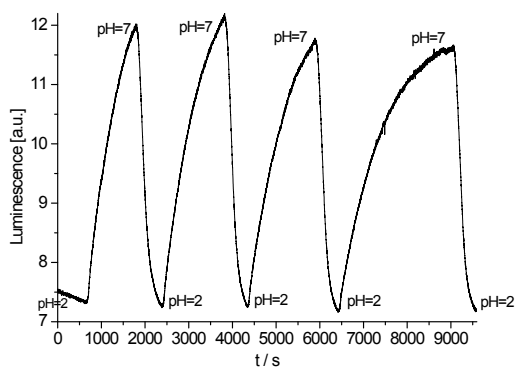

Figure S7 Reversibility of pH sensor membrane (thickness  $30 \mu\text{m}$ ) when switching from pH 2-7.

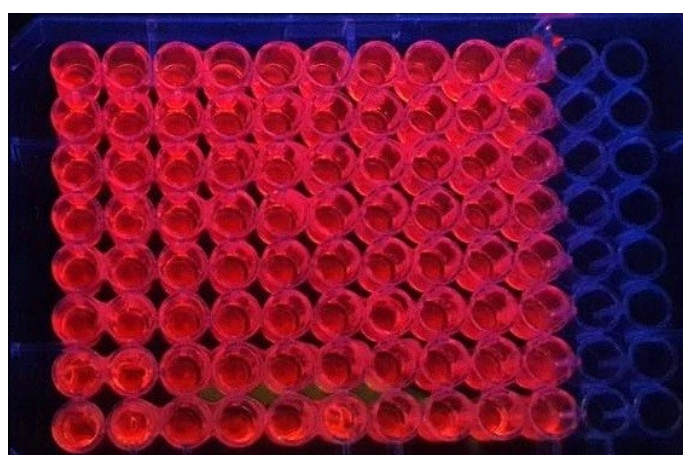

Figure S8 pH sensor microtiterplate with  $\text{Eu}^{3+}$ -TTA-PDA-Gall (1:3:1:1) upon illumination with UV lamp (366 nm).

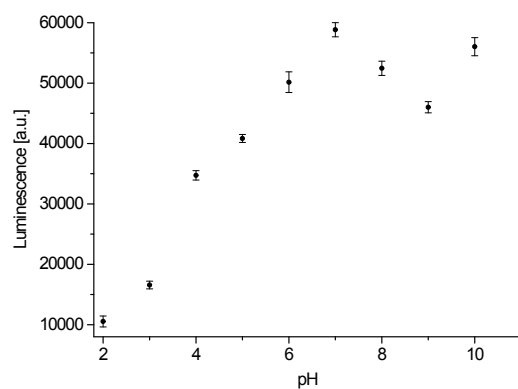

Figure S9 Response of sensor microtiterplate with  $\text{Eu}^{3+}$ -TTA-PDA-Gall (Ac-MOPS-CAPS buffer (10 mmol/L) to various pH ( $\lambda_{\text{em}} = 615 \text{ nm}$ ,  $\lambda_{\text{exc}} = 355 \text{ nm}$ ,  $n=8$ ) after 24 h.
